# Supplementary material for: Soft, tough, and fast polyacrylate dielectric elastomer for non-magnetic motor
Source: PubMed Central journal article supplement (PMC8313586; doi:10.1038/s41467-021-24851-w), 2021-07-26
Supplement: 41467_2021_24851_MOESM3_ESM.pdf [file 41467_2021_24851_MOESM3_ESM.pdf]

## **Description of Additional Supplementary Files**

File Name: Supplementary Movie 1

Description: VHB<sup>TM</sup>4910-based non-magnetic motor at different driving frequency under 48 MV m<sup>-1</sup>

File Name: Supplementary Movie 2

Description: BAC2-based non-magnetic motor at different driving frequency under 48 MV m<sup>-1</sup>

File Name: Supplementary Movie 3

Description: BAC2-based non-magnetic motor with transmission gears at different driving frequency under 48 MV m<sup>-1</sup>

File Name: Supplementary Movie 4

Description: Process of pre-stretching using a custom-built rig
